# Supplementary material for: Strong anharmonicity and medium-temperature thermoelectric efficiency in antiperovskite Ca3XN (X = P, As, Sb, Bi) compounds
Source: Royal Society of Chemistry journal article supplement (doi:10.1039/d4ta02118e), 2024-01-01
Supplement: d4ta02118e1.pdf [file d4ta02118e1.pdf]

# Supplementary material of “Strong anharmonicity and medium-temperature thermoelectric efficiency in antiperovskites $\text{Ca}_3\text{XN}$ ( $\text{X} = \text{P}, \text{As}, \text{Sb}, \text{Bi}$ ) compounds”

Shuyao Lin<sup>a,b,d</sup>, Jincheng Yue<sup>c,d</sup>, Wenling Ren<sup>d</sup>, Chen Shen<sup>d,\*</sup>, Hongbin Zhang<sup>d</sup>

<sup>a</sup>*Institute of Materials Science and Technology, TU Wien, A-1060, Vienna, Austria*

<sup>b</sup>*Department of Physics, Chemistry, and Biology (IFM), Linköping University, SE-58183, Linköping, Sweden*

<sup>c</sup>*Institute of High Pressure Physics, School of Physical Science and Technology, Ningbo University, 315211, Ningbo, China*

<sup>d</sup>*Institute of Materials Science, TU Darmstadt, 64287, Darmstadt, Germany*

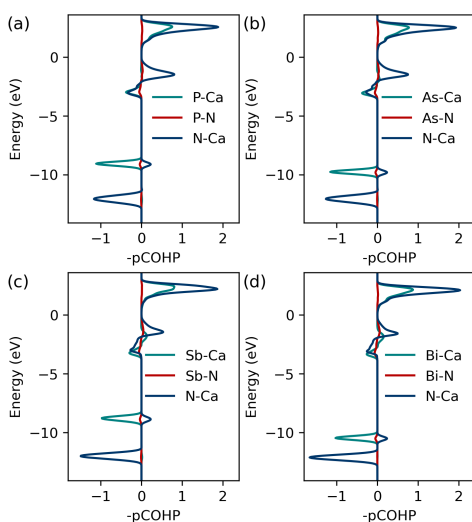

Figure 1: Crystal orbital Hamilton population (COHP) of  $\text{Ca}_3\text{XN}$  for the nearest neighbor of bonding: (a)  $\text{Ca}_3\text{PN}$  (b)  $\text{Ca}_3\text{AsN}$  (c)  $\text{Ca}_3\text{SbN}$  (d)  $\text{Ca}_3\text{BiN}$ .

\*\*

*Email address: chenshen@tmm.tu-darmstadt.de (Chen Shen)*

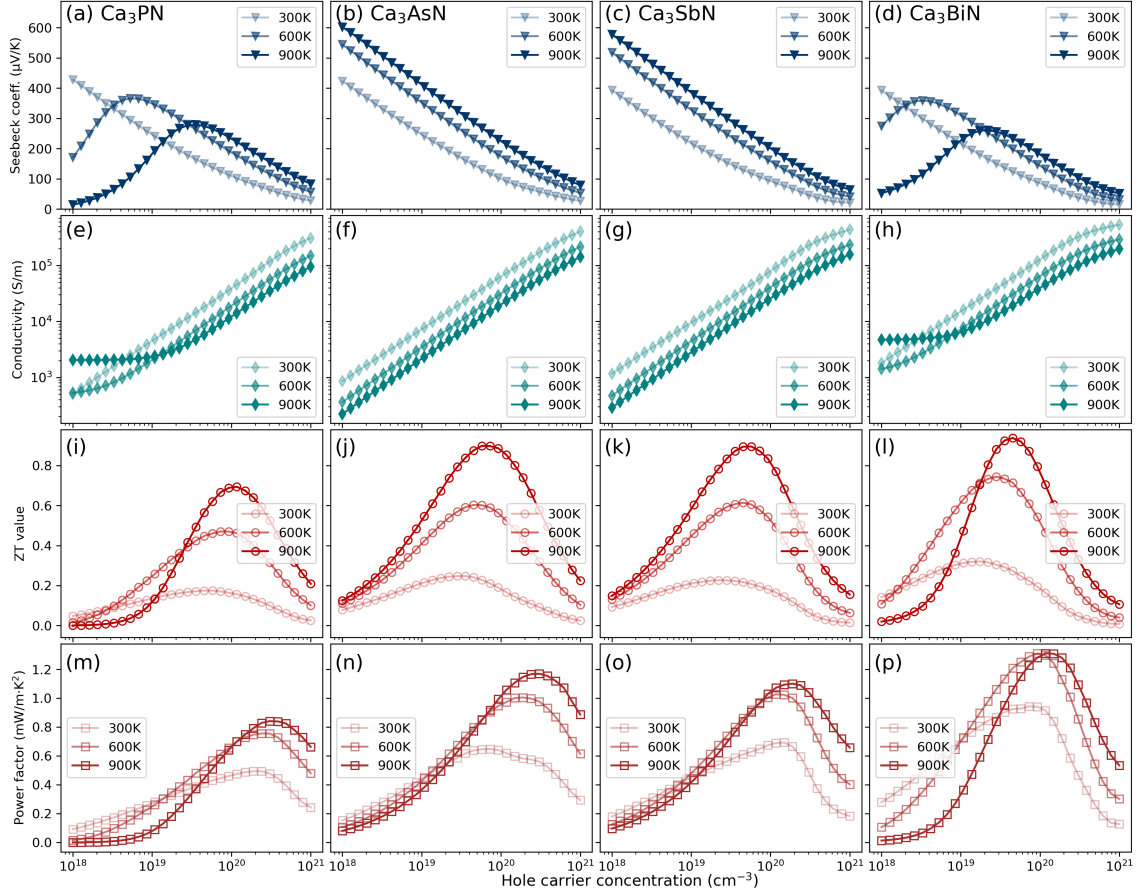

Figure 2: The p-type electronic transport parameters of  $\text{Ca}_3\text{XN}$ : (a-d) Seebeck coefficient  $S$ , and (e-h) figure of merit  $ZT$  at 300, 600, and 900 K, respectively. From left to right is:  $\text{Ca}_3\text{PN}$ ,  $\text{Ca}_3\text{AsN}$ ,  $\text{Ca}_3\text{SbN}$  and  $\text{Ca}_3\text{BiN}$ .
